# Supplementary material for: Expression, Purification, and Characterization of Interleukin-11 Orthologues
Source: PubMed Central journal article supplement (PMC6274577; doi:10.3390/molecules21121632), 2016-11-29
Supplement: molecules-21-01632-s001.pdf [file molecules-21-01632-s001.pdf]

# Supplementary Materials: Expression, Purification, and Characterization of Interleukin-11 Orthologues

Andrei S. Sokolov, Alexei S. Kazakov, Valery V. Solovyev, Ramis G. Ismailov, Vladimir N. Uversky, Yulia S. Lapteva, Roman V. Mikhailov, Ekaterina V. Pavlova, Iana O. Terletskaia, Ludmila V. Ermolina, Sergei E. Permyakov and Eugene A. Permyakov

**Table S1.** The nucleotide sequences encoding mature IL-11 from *Macaca fascicularis* (№1) and *Mus musculus* (№2) lacking Pro1 residue (Swiss-Prot entries P20808 and P47873, respectively). The corresponding protein sequences and their alignment with human IL-11 are shown in Figure S1.

| № | Nucleotide sequence                                                                                                                                                                                                                                                                                                                                                                                                                                                                                                                            |
|---|------------------------------------------------------------------------------------------------------------------------------------------------------------------------------------------------------------------------------------------------------------------------------------------------------------------------------------------------------------------------------------------------------------------------------------------------------------------------------------------------------------------------------------------------|
| 1 | ggtcgcccaggtagccctcgtgcaagcccggatccgctgctgaactggactcactgtgctgctgacgcgtagcctcctggaagatactcgtc<br>agctgactatccaactgaaagacaaattcccggctgatggtgaccacaacctggattcctgccactctggctatgagcgcgggcgcgtgggtgc<br>gctgcaactgccatctgttctgaccctcgtcgtgacagacctgctgagctacctgcccactccagtggtcgtcgtgctgagggcagctcctga<br>aaacctggagccggaactgggtacacctgacagacctgctggaccgctgctgcccgtctgagctgtgatgctcgcctggcctgctcagctg<br>ccgctgatccgagctccaccgtggccccgcgagctccactgggggtggtattcgtgacgacacgcaatcctggggcgtgctgacactgacc<br>tggactggcggtacgtggtctgcttctgctcaaaactgcctgtaa |
| 2 | ggtcaccggcaggctctcctcgtgctcctccgacccccgcgagatctggattctgcccgtgtactgaccgtagtctgctggctgataccgccag<br>ctggctcccagatgctgataaattcctgccgacggcgatcactctggatagcctgccactctgccatgtcagcaggcaccctggctcctg<br>cagttaccgggtgtgctgactcgcctcgtgttgatctgatgagttattacccatgtacagtggtcctgcccgtgaggtgctcctccctgaaact<br>tagagccggagctgggtgccctgacggcagctctggaacgtctcctcgtcgtcgtgcaactctgatgctgcccctggcctgccccaggcggctcc<br>ggatcagccgtaatcccgtcggctccctgcatcagcatgggggagttatcgcgtgctcatgctgattctggggcggactgcacctacccttgatt<br>ggcctgctgcccggctgcttctgaaactcggcttaa   |

**Table S2.** Nucleotide sequences of the primers used for cloning of macaque and mouse IL-11 genes (Table S1) into pHUE vector between the *SacII* and *NotI* restriction sites (underlined).

| № | Primer name                    | 5' to 3' end sequence                       |
|---|--------------------------------|---------------------------------------------|
| 1 | IL-11 macaque <i>SacII</i>     | atct <u>ccg</u> ggtggtggtccgccagg           |
| 2 | IL-11 mouse <i>SacII</i>       | atct <u>ccg</u> ggtggtggtccaccggcaggc       |
| 3 | IL-11 macaque stop <i>NotI</i> | tatt <u>ggc</u> ccgattacaggcagttttgagcagaag |
| 4 | IL-11 mouse stop <i>NotI</i>   | tatt <u>ggc</u> ccgattaaagccgagtttcagaagc   |

**Table S3.** ESI-MS data for macaque and murine rIL-11 samples, estimated from the data shown in Figure 4.

| Protein        | Molecular mass of the component (relative content) | Description of the component      |
|----------------|----------------------------------------------------|-----------------------------------|
| Macaque rIL-11 | 19,292 Da (49%)                                    | corresponds to the predicted mass |
|                | 19,313 Da (21%)                                    | one sodium atom is bound          |
|                | 19,390 Da (20%)                                    | unassigned component              |
|                | 19,930 (10%)                                       | unassigned component              |
| Murine rIL-11  | 19,057 Da (48%)                                    | corresponds to the predicted mass |
|                | 19,080 Da (25%)                                    | one sodium atom is bound          |
|                | 19,103 Da (14%)                                    | two sodium atoms are bound        |
|                | 19,695 Da (12%)                                    | unassigned component              |

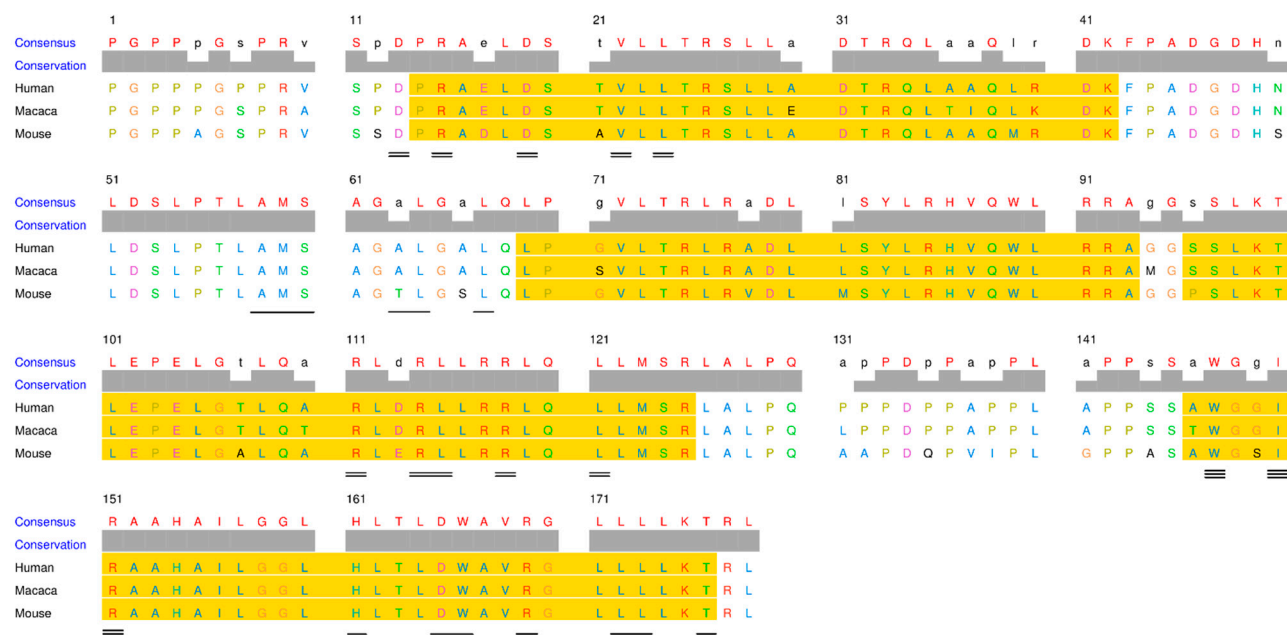

**Figure S1.** Conservation analysis of mature IL-11 orthologs from human, macaque and mouse (Swiss-Prot entries P20809, P20808 and P47873, respectively). The protein sequences were aligned using online Clustal Omega service (<http://www.ebi.ac.uk/Tools/msa/clustalo/>). The alignment and sequence conservation are visualized using UCSF Chimera v.1.10.2 software.  $\alpha$ -Helical regions are marked as orange filled rectangles. The sites proposed for human IL-11 interaction with IL-11R $\alpha$  (site I, single underline) and gp130 (site II, double underline; site III, triple underline) receptors [1] are indicated (see Figure 1).

>sp|P20809|IL11\_HUMAN Interleukin-11 OS=Homo sapiens GN=IL11 PE=1 SV=1, residues 22-199

PGPPPGPPRVSPDPRAELDSTVLLTRSLADTRQLAAQLRDKFPADGDHNLDSLPTLAMSAGALGA  
LQLPGVLTRLRADLLSYLRHVQWLRRAGGSSSLKTLEPELGTQLARLDRLRLRRLQLLMSRLALPQPP  
PDPPAPPLAPPSSAWGGIRAAHAILGGLHLTLDWAVRGLLLKTRL

>sp|P20808|IL11\_MACFA Interleukin-11 OS=Macaca fascicularis GN=IL11 PE=2 SV=1, residues 22-199

PGPPPGSPRASDPRAELDSTVLLTRSLLEDTRQLTIQLKDKFPADGDHNLDSLPTLAMSAGALGA  
LQLPSVLTRLRADLLSYLRHVQWLRRAMGSSSLKTLEPELGTQLTRLDRLRLRRLQLLMSRLALPQLP  
PDPPAPPLAPPSSTWGGIRAAHAILGGLHLTLDWAVRGLLLKTRL

>sp|P47873|IL11\_MOUSE Interleukin-11 OS=Mus musculus GN=Il11 PE=1 SV=1, residues 22-199

PGPPAGSPRVSSDPRADLDSAVLLTRSLADTRQLAAQMRDKFPADGDHSLDSLPTLAMSAGTLGS  
LQLPGVLTRLRVDLMSYLRHVQWLRRAGGPPSLKTLEPELGTALQARLERLLRRLQLLMSRLALPQAA  
PDQPVIPLGPPASAWGSIRAAHAILGGLHLTLDWAVRGLLLKTRL

>sp|P05231|IL6\_HUMAN Interleukin-6 OS=Homo sapiens GN=IL6 PE=1 SV=1, residues 26-212

FPAPVPPGEDSKDVAAPHRQPLTSSERIDKQIRYILDGISAALRKETCNKSNMCESSKEALAENNLN  
LPKMAEKDGCQSGFNEETCLVKIITGLLEFEVYLEYLQNRFESEEQARAVQMSTKVLIQFLQKK  
AKNLDAITTPDPTTNASLLTKLQAQNQWLQDMTTHLILRSFKEFLQSSLRALRQM

>sp|P79341|IL6\_MACFA Interleukin-6 OS=Macaca fascicularis GN=IL6 PE=2 SV=1, residues 26-212

FPAPVLPGEDSKDVAAPHSQPLTSSERIDKHIRYILDGISAALRKETCNRSNMCESSKEALAENNLN  
LPKMAEKDGCQSGFNEDTCLVKIITGLLEFEVYLEYLQNRFESEEQARAVQMSTKVLIQFLQKK  
AKNLDAITTPPTTNASLLTKLQAQNQWLQDMTTHLILRSFKEFLQSSLRALRQM

>sp|P08505|IL6\_MOUSE Interleukin-6 OS=Mus musculus GN=Il6 PE=1 SV=1

FPTSQVRRGDFTEDTTPNRPVYTTSQVGGLITHVLWEIVEMRKELCNGNSDCMNNDDALAENNLKL  
PEIQRNDGCYQTGYNQEICLLKISSGLLEYHSYLEYMKNNLKDKNKKDKARVLQRDTETLIHIFNQE  
VKDLHKIVLPTPISNALLTDKLESQKEWLRTKTIQFILKSLEEFKVTLRSTRQT

**Figure S2.** Amino acid sequences of mature forms of IL-11 and IL-6 from *Homo sapiens*, *Macaca fascicularis*, and *Mus musculus*

## Reference

1. Putoczki, T.L.; Dobson, R.C.; Griffin, M.D. The structure of human interleukin-11 reveals receptor-binding site features and structural differences from interleukin-6. *Acta Crystallogr. D Biol. Crystallogr.* **2014**, *70*, 2277–2285.
